# Supplementary material
Source: PubMed Central journal article supplement (PMC7447230)
Supplement: mmc1.pdf [file mmc1.pdf]

# THE LANCET

## Global Health

### Supplementary appendix 1

This translation in Bangla was submitted by the authors and we reproduce it as supplied. It has not been peer reviewed. *The Lancet's* editorial processes have only been applied to the original in English, which should serve as reference for this manuscript.

‘এই [বাংলায়] অনুবাদটি লেখকরা জমা দিয়েছিলেন এবং এটি যেমনভাবে দেওয়া হয়েছে আমরা সেইভাবেই পুনরায় বর্ণনা করছি। এটি কোনো সমকক্ষ ব্যক্তি পর্যালোচনা করেননি। দ্য ল্যানসেট-এর সম্পাদকীয় প্রক্রিয়াগুলি শুধুমাত্র মূল ইংরেজিতে প্রয়োগ করা হয়েছে, যা এই পাল্ডুলিপির রেফারেন্স হিসাবে কাজ করবে।’

Supplement to: Hamadani JD, Hasan MI, Baldi AJ, et al. Immediate impact of stay-at-home orders to control COVID-19 transmission on socioeconomic conditions, food insecurity, mental health, and intimate partner violence in Bangladeshi women and their families: an interrupted time series. *Lancet Glob Health* 2020; published online Aug 25. [http://dx.doi.org/10.1016/S2214-109X\(20\)30366-1](http://dx.doi.org/10.1016/S2214-109X(20)30366-1).

বাংলাদেশী নারী এবং তাদের পরিবারের আর্থ- সামাজিক অবস্থা, খাদ্য নিরাপত্তাহীনতা, মানসিক স্বাস্থ্য এবং ঘনিষ্ঠ সঙ্গী দ্বারা নির্যাতন :

কোভিড - ১৯ এর সংক্রমণ রোধে ঘরে থাকার নির্দেশ এর তাৎক্ষণিক প্রভাব একটি ইন্টার্যাপটেড টাইম সিরিজ বিষয়ক গবেষণা।

সারমর্ম

পটভূমি :

কোভিড - ১৯ সংক্রমণ প্রতিরোধকল্পে ঘরে থাকার নির্দেশ (লকডাউন) বিশ্বের বিভিন্ন স্থানে প্রয়োগ করা হয়েছে, যা অর্থনৈতিক ও মানসিক অবস্থার অবনতি ঘটাতে পারে এবং খাদ্য নিরাপত্তাহীনতা ও ঘনিষ্ঠ সঙ্গী- দ্বারা নির্যাতনের মাত্রা বাড়িয়ে তুলতে পারে। স্বল্প আয়ের সমাজ ব্যবস্থায় এই নির্দেশনার সুষ্ঠু বাস্তবায়ন নিশ্চিত করার জন্য নিম্ন এবং নিম্ন মধ্যবিত্ত আয়ের দেশগুলোর উপর লকডাউনের প্রভাব নিরূপণ করা প্রয়োজন। গ্রাম -বাংলার মহিলা এবং তাদের পরিবারের উপর কোভিড-১৯ জনিত লকডাউনের তাৎক্ষণিক প্রভাব জানাই এই গবেষণার উদ্দেশ্য।

পদ্ধতি :

এই গবেষণায় "ইন্টার্যাপটেড টাইম সিরিজ" পদ্ধতি ব্যবহার করে বাংলাদেশের রূপগঞ্জ উপজেলার গ্রামাঞ্চলের কিছু পরিবারের তথ্য সংগ্রহ করা হয়েছে যাদেরকে দৈবচয়ন পদ্ধতিতে নেওয়া হয়েছে এবং তারা ইতিপূর্বে এক দৈবচয়ন নিয়ন্ত্রিত গবেষণায় অংশগ্রহণ করেছিলেন। এখানে মহামারীর প্রায় ১ ও ২ বছর আগে তাদের আয়, খাদ্য নিরাপত্তাহীনতা এবং মানসিক স্বাস্থ্য সংক্রান্ত প্রাপ্ত তথ্যাবলীর সাথে লকডাউন সময়কালীন সংগৃহীত তথ্য তুলনা করে দেখা হয়েছে।

এছাড়াও আমরা এই বিশ্বব্যাপী মহামারীর সময়ে ঘনিষ্ঠ সঙ্গী দ্বারা নারী নির্যাতনের তথ্য সংগ্রহ করেছি।

ফলাফল :

১৯ শে মে হতে ১৮ই জুন, ২০২০ এর মধ্যবর্তী সময়ে আমরা ৩০১৬ জন শিশুর মাকে দৈবচয়ন এর ভিত্তিতে আমাদের এই গবেষণায় অংশগ্রহণের আমন্ত্রণ জানিয়েছিলাম, যার মাঝে ২৪২৪ জন সম্মতি দিয়েছিলেন। ২৪১৭ জন মায়ের মধ্যে ২৪১৪ জন (৯৯.৯% [৯৫%CI ৯৯.৬-৯৯.৯]) বাড়িতে থাকা' পরামর্শ সম্পর্কে জানতেন এবং তা মেনে চলেছেন। ২৪১৭ জন মায়ের মধ্যে ২৩২১ জন (৯৬.০% [৯৫.২-৯৬.৭]) সংসারের রোজগার কমে যাওয়ার কথা জানিয়েছেন। লকডাউনের সময় পরিবারগুলোর মাসিক গড় আয় লকডাউনের পূর্বে থাকা ২১২ ইউ এস ডলার হতে কমে ৫৯ ইউ এস ডলার হয়েছে। অধিকন্তু প্রতিদিন ১.৯০ ডলার এর নীচে আয় করা পরিবারের

সংখ্যা আগের তুলনায় ০.২% (০.০-০.৫ [৫/২৪২২]) হতে বেড়ে লকডাউনের সময় ৪৭.৩% (৪৫.২-৪৯.৫ [৯৯২/২০৯৬],  $P < 0.0001$ ) হয়েছে।

মহামারীর পূর্বে, যেখানে ৫.৬% (৪.৭-৬.৬ [১৩৬/২৪২০]) এবং ২.৭% (২.১-৩.৪ [৬৫/২৪২০]) পরিবারে যথাক্রমে মাঝারী ও তীব্র খাদ্য নিরাপত্তাহীনতা ছিল যা লকডাউনের সময় তা বেড়ে যথাক্রমে ৩৬.৫% (৩৪.৫-৩৮.৪ [৮৮১/২৪১৭]) এবং ১৫.৩% (১৩.৯-১৬.৮ [৩৭১/২৪১৭]) হয়েছে; যে কোন মাত্রার খাদ্য নিরাপত্তাহীনতা, যা পরিবারগুলো অনুভব করেছে তা ৫১.৭% বেড়ে গিয়েছে (৪৮.১-৫৫.৪;  $P < 0.0001$ )। মায়াদের হতাশা এবং দুশ্চিন্তাজনিত লক্ষণগুলো লকডাউনের সময় বেড়ে গিয়েছিল। মহিলাদের মাঝে যারা আবেগীয় সমস্যায় ভুগছিলেন এবং মাঝারী শারীরিক নির্যাতনের শিকার হয়েছিলেন তাদের অর্ধেকের বেশি বলেছেন যে, এটা লকডাউনের সময় বেড়ে গিয়েছে।

### ব্যখ্যা/ অনুবাদঃ

কোভিড -১৯ লকডাউন সকল অর্থনৈতিক স্তরের গ্রামবাংলার মহিলা ও তাদের পরিবারের আর্থিক, মনোসামাজিক অবস্থা এবং শারীরিক সুস্থতা কে উল্লেখযোগ্যভাবে ঝুঁকিতে ফেলেছে। চরমভাবে সুবিধা বঞ্চিত পরিবারগুলোর পাশে দাড়ানোর পাশাপাশি সকল আক্রান্ত পরিবারের সাহায্য প্রয়োজন।

### অর্থায়নেঃ

ন্যাশনাল হেলথ এন্ড মেডিকেল রিসার্চ কাউন্সিল, অস্ট্রেলিয়া
