# Supplementary material
Source: PubMed Central journal article supplement (PMC7447230)
Supplement: mmc2.pdf [file mmc2.pdf]

# THE LANCET

## Global Health

### Supplementary appendix 2

This appendix formed part of the original submission and has been peer reviewed. We post it as supplied by the authors.

Supplement to: Hamadani JD, Hasan MI, Baldi AJ, et al. Immediate impact of stay-at-home orders to control COVID-19 transmission on socioeconomic conditions, food insecurity, mental health, and intimate partner violence in Bangladeshi women and their families: an interrupted time series. *Lancet Glob Health* 2020; published online Aug 25. [http://dx.doi.org/10.1016/S2214-109X\(20\)30366-1](http://dx.doi.org/10.1016/S2214-109X(20)30366-1).

**Immediate impact of stay-at-home orders to control COVID-19 transmission on socioeconomic conditions, food insecurity, mental health and intimate partner violence in Bangladeshi women and their families: an interrupted time-series**

**Supplementary Appendix**

|                                                                                                                                   |    |
|-----------------------------------------------------------------------------------------------------------------------------------|----|
| Inclusion and Exclusion Criteria for BRISC Trial .....                                                                            | 2  |
| Questionnaire .....                                                                                                               | 3  |
| Supplementary Data .....                                                                                                          | 10 |
| Supplementary Figure 1: Recruitment flow diagram .....                                                                            | 10 |
| Supplementary Figure 2: COVID-19 Situation in Bangladesh June 11 <sup>th</sup> 2020 .....                                         | 11 |
| Supplementary Table 1: Baseline characteristics of overall BRISC trial families.....                                              | 12 |
| Supplementary Table 2: Comparisons in asset ownership and child stunting between COVID impact study and national population ..... | 14 |
| Supplementary Table 3: Financial impact of COVID-19 lockdown.....                                                                 | 15 |
| Supplementary Table 4: Interrupted time series analyses .....                                                                     | 16 |
| Supplementary Table 5: Impact of COVID-19 lockdown on mental health .....                                                         | 18 |
| Supplementary Table 6: Intimate partner violence during the COVID-19 lockdown.....                                                | 19 |
| Supplementary Text 1: Reliability and agreement in COVID-19 impact pilot study.....                                               | 21 |

## Inclusion and Exclusion Criteria for BRISC Trial

### **Inclusion criteria**

Each child had to meet all of the following criteria to be enrolled in this study:

- Aged 8 months ( $\pm 14$  days) at the time of randomisation
- Not expected to leave the study site for more than 1 week over the next 3 months, or for more than one month over the next 12 months.
- Had a legally acceptable representative capable of understanding the informed consent document and providing consent on the participant's behalf.

### **Exclusion criteria**

Children meeting any of the following criteria were excluded from the study:

- Has a capillary Hb at screening of  $< 8.0$ g/dL at the time of screening
- Drinking water iron level  $> 1$ g/L
- Had an established diagnosis of any homozygous or compound heterozygous haemoglobinopathies (i.e. beta thalassaemia major, HbE-beta thalassaemia).
- Current infective illness with fever (respiratory infection, diarrhoea); however, children will be screened again after recovery and recruited as long as they meet the age eligibility criteria at second screening.
- Had received iron supplements or iron-containing multiple micronutrient powders in the previous month (15 days or more).
- Known congenital anomaly, developmental disorder or severe developmental delay
- Child of multiple birth e.g. twin, triplets
- Mid upper arm circumference  $< 11.5$ cm

## Questionnaire

### **Benefits and Risks of Iron interventions in Children (BRISC): Follow-up of a randomized controlled trial in Rupgonj- rural Bangladesh**

Impact of Covid19 Pandemic on health and wellbeing of rural Bangladeshi population: Rupganj experience.

#### **SECTION A: Participant's availability over Telephone**

*[Note to interviewer: Please retake consent of the participant. 1<sup>st</sup> ask the mother whether she is free to spare 25-30 minutes to respond to some questions over phone. If the mother is busy or hesitant, please make an appointment for a future interview. If the father or another person answers the phone, ask them if they can please give the phone to the mother of the child. If mother is not available, ask for the primary care-giver of the child and only conduct sections A-D and drop E.*

1. Where are you staying during the lockdown?  
1=Rupganj  
2=outside of Rupganj, please specify \_\_\_\_\_
2. Is the respondent available for and willing to complete the interview? 1=Yes [Go to question 3] 0=No  
/\_\_\_/
3. What is the main reason the interview could not be completed? |\_\_\_|  
1=Interviewer cannot locate the participant: 1a) Incorrect mobile number, 1b) request number does not work  
2=Respondent is busy [1<sup>st</sup> call on |\_\_\_|\_\_\_|\_\_\_| 2<sup>nd</sup> call on |\_\_\_|\_\_\_|\_\_\_| 3<sup>rd</sup> call on |\_\_\_|\_\_\_|\_\_\_|  
3=Participant is deceased [stop here], 4=Respondent refused interview[stop here]. Stop the interview after 3 calls.  
Instruction: **Please read the consent form for the respondent and at the very beginning explain the consent to mother and tell her that the consent procedure will be recorded.**
4. **Did the respondent give consent?** 1=Yes [Continue to question 5, 0= No [Stop the interview] |\_\_\_|
5. Who is answering questions about the child? |\_\_\_|  
1=Child's Mother, 2= Others (Please specify) \_\_\_\_\_
6. Who is primary care giver of the child? 1=Child's Mother, 2= Others (Please specify) \_\_\_\_\_  
/\_\_\_/
7. Do you have any school going child(ren)? 1=Yes, 0= No |\_\_\_| [if no, skip 8 & 9]
8. Do they study at home? 1=Yes, 0= No |\_\_\_| [if no, skip 8a & 8b]  
8.a If yes, how are they spending their time in study during these holidays? 0=Do not study at all, 1=Spend very little time to study, 2= Studies sometimes, 3=Studying most of the time |\_\_\_|  
8.b How do they study most of the time? 1= Study at home alone, 2=Study online/with the help of somebody/ doing online course/ attending classes tele casts by TV
9. If you have school going child(ren), did they miss any exam due to COVID or was any exam cancelled?  
1=Yes (Exam name \_\_\_\_\_), 0= No |\_\_\_|

#### **SECTION B: Morbidity information**

You may know that due to COVID-19/Corona infection, we have a countrywide lockdown since 4<sup>th</sup> week of March 20. Now I will ask you details about any illness, financial situation and mental health of the family since these lockdown period. Please give answers considering this situation.

10. Did anyone in your household suffer from any of the following symptoms? 1=yes, 0=no [note to interviewer: please use separate lines for each of the symptoms]

10a. who?

Code:1=Study child, 2=Mother, 3=Father, 4=Siblings, 5=Other relatives (grandparents/aunt/uncle)-  
(please specify)

10b. Symptoms list 1.Fever  Who was/were affected    \_\_\_\_\_

2.Severe headache  Who was/were affected    \_\_\_\_\_

3.Body ache  Who was/were affected    \_\_\_\_\_

4. Cough  Who was/were affected    \_\_\_\_\_

5. Runny nose  Who was/were affected    \_\_\_\_\_

6. Difficulty in breathing/distress Who was/were affected    \_\_\_\_\_

7.Throat pain/sore throat  Who was/were affected    \_\_\_\_\_

8.Vomiting  Who was/were affected    \_\_\_\_\_

9. Diarrhoea  Who was/were affected    \_\_\_\_\_

10. Fatigue  Who was/were affected    \_\_\_\_\_

11. Loss of smell/taste , Who was/were affected    \_\_\_\_\_

12. Rash  Who was/were affected    \_\_\_\_\_

13. Others (please specify).    \_\_\_\_\_

\_\_\_\_\_

11. Did anyone in your household tested and diagnosed as Corona (COVID-19) illness? 0= Tested but not a case , 1=Yes, tested and diagnosed as positive 2=Not tested, Go to next section if response is 0 or 2

12. What is the total number of cases diagnosed in your HH?

13. What were the symptoms of the cases please read the symptoms to mother, record separately for more than one case.

0= No symptoms [Go to question 13.a]

1.Fever  2.Severe headache  3.Body ache  4. Cough  5. Runny nose  6.

Difficulty in breathing/distress 7.Throat pain/sore throat  8.Vomiting  9. Diarrhoea

10. Fatigue  11. Loss of smell/taste , 12. Others (please

specify).  \_\_\_\_\_

13a) How was s/he treated? 1=Treated at home, 2= Admitted to Hospital

13b) What was the outcome? 3=Recovered, 2=Still suffering, 1=Died

### **Section C: Financial situation**

14. Has your family been aware of the advice to remain at home / social isolation? 1=Yes , 0= No

15. Have you and your family been following this advice? 2= Yes, completely, 1=Yes, sometimes, 0= No

16. Who went out of home most of the time?

1= Child's mother

2= Child's Father

3=Child's brother/sister

4= Others, specify \_\_\_\_\_

17. How many times per week did she/he have to leave the house?

0=never, 1=Less than once a week, 2=once/week, 3=2-3 times/week, 4=almost everyday

17a. has it changed since COVID-19 situation? 1=more than before, 2= same 3= less than before |\_\_|

18. What was the reason for leaving the house? Multiple answers allowed.

0=NA (not going out) 1=Yes, 0= No |\_\_|

1=Recreation/playing 1=Yes, 0= No |\_\_|

2=Shopping necessities 1=Yes, 0= No |\_\_|

3=Working/job 1=Yes, 0= No |\_\_|

4= Home garden/farm 1=Yes, 0= No |\_\_|

5=Others [please specify] 1=Yes, 0= No |\_\_|

19. Has there been a reduction in work for the father or other earning members of the family due to loss of job/business? 1=Yes, 0= No |\_\_|

20. What is your monthly family income now |\_\_| |\_\_| |\_\_| |\_\_| |\_\_| |\_\_| Taka

[note to interviewer: if more than one income source, please note down all the reported income and sum up here]

21. Has it reduced substantially after COVID-19 situation? 0= No/<one quarter, 1=a quarter reduced, 2=half reduced, 3=three quarter reduced, 4=completely reduced, no income at present 9= Don't know |\_\_|

**[If no, skip question 23]**

22. How are you coping with reduced family income now?

a) From current income, 1=Yes, 0= No |\_\_|

b) Utilizing savings, 1=Yes, 0= No |\_\_|

c) Procuring a loan, 1=Yes, 0= No |\_\_|

d) Selling valuables, 1=Yes, 0= No |\_\_|

e) Accessing Government relief, 1=Yes, 0= No |\_\_|

f) Accessing other relief (relatives, charitable donation etc), 1=Yes, 0= No |\_\_|

g) Others (Please specify) \_\_\_\_\_, 1=Yes, 0= No |\_\_|

h) Don't know

23. Do you consider yourself financially stable during this crisis? |\_\_|

1=Very unstable (Always worrying about income or future), 2=Somewhat unstable (Occasionally worrying about income), 3=Stable (No worries)

### **Household Food Insecurity Questionnaire**

Each of the questions in the following table is asked with a recall period of four weeks (30 days). The respondent is first asked an occurrence question – that is, whether the condition in the question happened at all in the past four weeks (yes or no). If the respondent answers “yes” to an occurrence question, a frequency-of-occurrence question is asked to determine whether the condition happened rarely (once or twice), sometimes (three to ten times) or often (more than ten times) in the past four weeks.

| No   | Question                                                                                                                                  | Response option                    | Code |
|------|-------------------------------------------------------------------------------------------------------------------------------------------|------------------------------------|------|
| 24.  | In the past four weeks, did you worry that your household would not have enough food?                                                     | 0 = No (skip to Q.2)<br>1 = Yes    |      |
| 24.a | How often did this happen in the past four weeks?                                                                                         | (1=Rarely, 2=Sometimes, 3 = Often) |      |
| 25   | In the past four weeks, were you or any household member not able to eat the kinds of foods you preferred because of a lack of resources? | 0 = No (skip to Q.3)<br>1 = Yes    |      |
| 25a  | How often did this happen in the past four weeks?                                                                                         | (1=Rarely, 2=Sometimes, 3 = Often) |      |

|     |                                                                                                                                                                                  |                                    |  |
|-----|----------------------------------------------------------------------------------------------------------------------------------------------------------------------------------|------------------------------------|--|
| 26  | In the past four weeks, did you or any household member have to eat a limited variety of foods due to a lack of resources?                                                       | 0 = No (skip to Q.4)<br>1 = Yes    |  |
| 26a | How often did this happen in the past four weeks?                                                                                                                                | (1=Rarely, 2=Sometimes, 3 = Often) |  |
| 27  | In the past four weeks, did you or any household member have to eat some foods that you really did not want to eat because of a lack of resources to obtain other types of food? | 0 = No (skip to Q.5)<br>1 = Yes    |  |
| 27a | How often did this happen in the past four weeks?                                                                                                                                | (1=Rarely, 2=Sometimes, 3 = Often) |  |
| 28  | In the past four weeks, did you or any household member have to eat a smaller meal than you felt you needed because there was not enough food?                                   | 0 = No (skip to Q.6)<br>1 = Yes    |  |
| 28a | How often did this happen in the past four weeks?                                                                                                                                | (1=Rarely, 2=Sometimes, 3 = Often) |  |
| 29  | In the past four weeks, did you or any household member have to eat fewer meals in a day because there was not enough food?                                                      | 0 = No (skip to Q.7)<br>1 = Yes    |  |
| 29a | How often did this happen in the past four weeks?                                                                                                                                | (1=Rarely, 2=Sometimes, 3 = Often) |  |
| 30  | In the past four weeks, was there ever no food to eat of any kind in your household because of lack of resources to get food?                                                    | 0 = No (skip to Q.8)<br>1 = Yes    |  |
| 30a | How often did this happen in the past four weeks?                                                                                                                                | (1=Rarely, 2=Sometimes, 3 = Often) |  |
| 31  | In the past four weeks, did you or any household member go to sleep at night hungry because there was not enough food?                                                           | 0 = No (skip to Q.9)<br>1 = Yes    |  |
| 31a | How often did this happen in the past four weeks?                                                                                                                                | (1=Rarely, 2=Sometimes, 3 = Often) |  |
| 32  | In the past four weeks, did you or any household member go a whole day and night without eating anything because there was not enough food?                                      | 0 = No (Stop)<br>1 = Yes           |  |
| 32a | How often did this happen in the past four weeks?                                                                                                                                | (1=Rarely, 2=Sometimes, 3 = Often) |  |

**Section D: Mental Health Questions**

33. Have you personally noticed any unusual police violence during this period? 0= No, haven't seen, 1=Yes, swearing/calling names badly 2=Physical violence |\_\_| **[not in TV]**

34. What is it like being in lock-down? 1=very frustrating, 2=sometimes frustrating, 3=I have accepted the situation, 4=I am enjoying the lock-down |\_\_|

35. What do you or other adults in the family usually do when (CHILD) behaves really badly? If answer "hit", probe with: With what did you hit the child and where on the body?

**Non-violent (Category A):**

- a) Explained why something was wrong 1=Yes, 0= No |\_\_|
- b) Gave him/her something else to do instead of what s/he was doing wrong 1=Yes, 0= No
- c) Took away privileges from him/her 1=Yes, 0= No |\_\_|
- d) Sent to sit by him/herself somewhere 1=Yes, 0= No |\_\_|

**Psychological aggression (Category B):**

- a) Threatened to spank or hit, but did not actually do it 1=Yes, 0= No |\_\_|
- b) Shouted, yelled or screamed at 1=Yes, 0= No |\_\_|
- c) Swore or cursed at him/her 1=Yes, 0= No |\_\_|
- d) Insulted or shamed him/her, that is, called him/her dumb or lazy or some other name like that 1=Yes, 0= No |\_\_|

- e) Said you would send him/her away or kick him/her out of the house 1=Yes, 0= No

Physical assault (Category C):

Minor Assault:

- a) Spanked him/her on the bottom with your bare hand 1=Yes, 0= No   
b) Slapped him/her on the hand, arm or leg 1=Yes, 0= No   
c) Hit him/her on the bottom with something like a belt, hairbrush, a stick or some other hard object  
1=Yes, 0= No   
d) Shook him/her 1=Yes, 0= No   
e) Hit other part of the body except the bottom with something like a belt, hairbrush, a stick or some other  
hard object 1=Yes, 0= No   
  
f) Pinched him/her 1=Yes, 0= No

Severe Assault (Physical Maltreatment):

- a) Slapped him/her on the face, head or ears 1=Yes, 0= No   
b) Hit him/her with a fist or kicked him/her Hard   
  
c) Threw or knocked him/her down 1=Yes, 0= No

Very Severe Assault (Extreme Physical Maltreatment):

- a) Beat up (hit him/her over and over as hard as you could) 1=Yes, 0= No   
b) Grabbed him/her around the neck and choked him/her 1=Yes, 0= No   
c) Burned or scalded him/her on purpose 1=Yes, 0= No   
d) Threatened him/her with a knife or gun 1=Yes, 0= No   
e) Other 1=Yes, 0= No

36. Has it changed since last days of March 2020? If yes how?  
1=more than before, 2= same 3= less than before

**CES-D shortened version:** The following statements describe how people sometimes feel about themselves. For each statement, please indicate how often you have felt this way during the past week.

37. In the last week, how many days, did you feel gloomy?   
38. In the last week, how many days, did you feel lonely?   
39. In the last week, how many days, did you weep?   
40. In the last week, how many days, did you enjoy life (cheerful, vivacious or jolly)?   
41. In the last week, how many days were you depressed (dejected/ frustrated)?   
42. In the last week, how many days, you didn't get interest doing something or you were not delighted?   
  
43. Has it changed since last days of March 2020? If yes how? 1=more than before, 2= same 3= less than before

**Generalised Anxiety Disorder Questionnaire (GAD-7)**

Over the last 2 weeks, how often have you been bothered by any of the following problems?

44. Feeling nervous, anxious or on edge? 0=Not at all (0-1 day), 1=Several days (2-6 days), 2=More than half the days (7-12 days), 3=Nearly everyday (13-14 days)



45. Not being able to stop or control worrying? 0=Not at all (0-1 day), 1=Several days (2-6 days), 2=More than half the days (7-12 days), 3=Nearly everyday (13-14 days)
46. Worrying too much about different things? 0=Not at all (0-1 day), 1=Several days (2-6 days), 2=More than half the days (7-12 days), 3=Nearly everyday (13-14 days)
47. Trouble relaxing? 0=Not at all (0-1 day), 1=Several days (2-6 days), 2=More than half the days (7-12 days), 3=Nearly everyday (13-14 days)
48. Being so restless that it is hard to sit still? 0=Not at all, 1=Several days, 2=More than half the days, 3=Nearly everyday
49. Becoming easily annoyed or irritable? 0=Not at all (0-1 day), 1=Several days (2-6 days), 2=More than half the days (7-12 days), 3=Nearly everyday (13-14 days)
50. Feeling afraid as if something awful might happen? 0=Not at all (0-1 day), 1=Several days (2-6 days), 2=More than half the days (7-12 days), 3=Nearly everyday (13-14 days)
51. Has it changed since last days of March 2020? If yes how? 1=more than before, 2= same 3= less than before |\_\_|

**Section E: Intimate Partner Violence**

52. Do you live with your husband in the same house? 1=Yes, 0= No |\_\_| **If no, stop the interview.**

Now I want to ask you a few questions about yourself. If you don't want to answer any question, you don't have to. I want to know how your relationship has been with your husband after the last days of March 2020 with the COVID-19 lockdown.

The next few questions are things that you may have experienced from your husband.

**Emotional/Psychological violence**

Since last days of March 2020, has your husband

53. Insulted you or did something that made you feel insulted?  
0=No, 1 =Yes, 8=NA, 9=Not interested to answer /\_\_/[if 0/8/9, Go to 54]
- 53a. Has this been different since the COVID situation? 1=more than before, 2= same 3= less than before, 8=NA, 9=Not interested to answer
54. Humiliated you in front of others?  
0=No, 1 =Yes, 8=NA, 9=Not interested to answer /\_\_/[if 0/8/9, Go to 55]
- 54a. Has this been different since the COVID situation? 1=more than before, 2= same 3= less than before, 8=NA, 9=Not interested to answer
55. Intimidated you (example: special look to scare you, shouting, breaking things etc.)?  
0=No, 1 =Yes, 8=NA, 9=Not interested to answer /\_\_/[if 0/8/9, Go to 56]
- 55a. Has this been different since the COVID situation? 1=more than before, 2= same 3= less than before, 8=NA, 9=Not interested to answer
56. Threatened you? 0=No, 1 =Yes, 8=NA, 9=Not interested to answer /\_\_/[if 0/8/9, Go to 57]

56a.Has this been different since the COVID situation? 1=more than before, 2= same 3= less than before, 8=NA, 9=Not interested to answer

### **Physical violence**

Since last days of March 2020, has your husband

57. Slapped you or thrown something at you that could hurt you?

0=No, 1 =Yes, 8=NA, 9=Not interested to answer /\_\_\_/ [if 0/8/9, Go to 58]

57a.Has this been different since the COVID situation? 1=more than before, 2= same 3= less than before, 8=NA, 9=Not interested to answer

58. Pushed you or shoved you or pulled your hair?

0=No, 1 =Yes, 8=NA, 9=Not interested to answer /\_\_\_/ [if 0/8/9, Go to 59]

58a.Has this been different since the COVID situation? 1=more than before, 2= same 3= less than before, 8=NA, 9=Not interested to answer

59. Hit you with his fist or with something else that could hurt you?

0=No, 1 =Yes, 8=NA, 9=Not interested to answer /\_\_\_/ [if 0/8/9, Go to 60]

59a.Has this been different since the COVID situation? 1=more than before, 2= same 3= less than before, 8=NA, 9=Not interested to answer

60. Kicked, dragged, beaten, choked or burnt you?

0=No, 1 =Yes, 8=NA, 9=Not interested to answer /\_\_\_/ [if 0/8/9, Go to 61]

60a.Has this been different since the COVID situation? 1=more than before, 2= same 3= less than before, 8=NA, 9=Not interested to answer

61. Threatened with or actually used a gun, knife or other weapon against you?

0=No, 1 =Yes, 8=NA, 9=Not interested to answer /\_\_\_/ [if 0/8/9, Go to 62]

61a. Has this been different since the COVID situation? 1=more than before, 2= same 3= less than before, 8=NA, 9=Not interested to answer

### **Sexual violence**

Since last days of March 2020, has your husband

62. Physically forced you to have sexual intercourse with him even when you do not want to?

0=No, 1 =Yes, 8=NA, 9=Not interested to answer /\_\_\_/ [if 0/8/9, Go to 63]

62a.Has this been different since the COVID situation? 1=more than before, 2= same 3= less than before, 8= NA, 9=Not interested to answer

63. What did your child do to make you smile today?

Thank you very much for participating in this interview.

## Supplementary Data

Supplementary Figure 1: Recruitment flow diagram

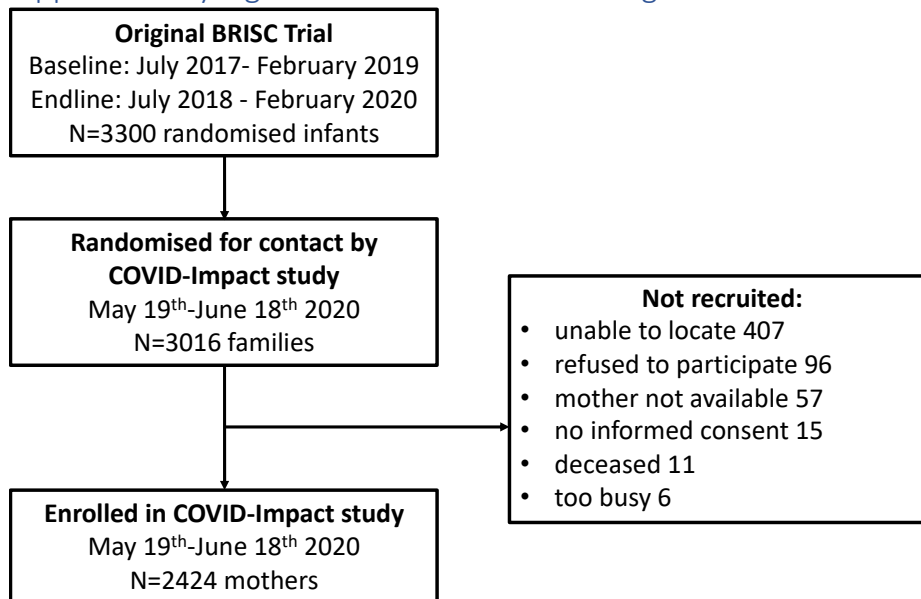

Unable to locate (N=407): The interviewer could not locate the potential participant due to either an incorrect mobile number (104/407 [25.6%]) or the preferred mobile number did not work (303/407 [74.4%]).

Supplementary Figure 2: COVID-19 Situation in Bangladesh June 11<sup>th</sup> 2020

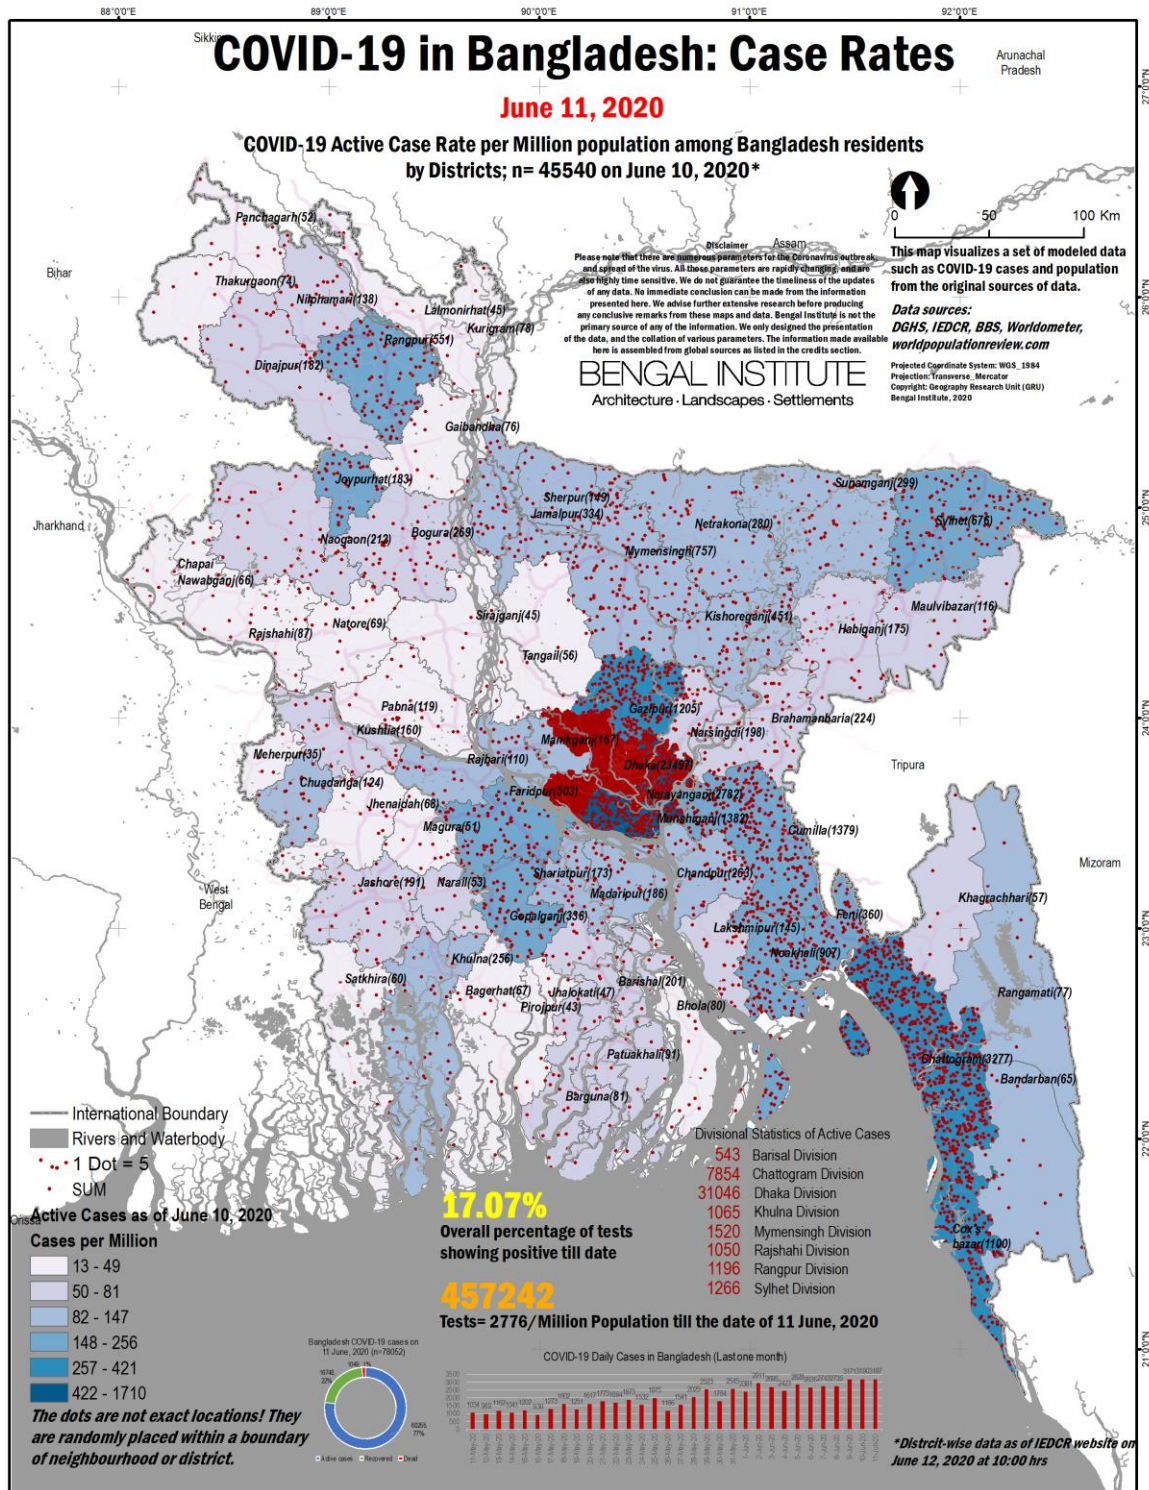

Study site = Rupganj Upazila, located in Narayanganj District. Map reproduced with permission: Bengal Institute for Architecture, Landscapes and Settlements

Supplementary Table 1: Baseline characteristics of overall BRISC trial families

|                                                                     | <b>BRISC<br/>Total<br/>N=3300</b> | <b>COVID impact study<br/>(May-June 2020)</b> |                               | <b>BRISC<br/>Not contacted<br/>N=284</b> |
|---------------------------------------------------------------------|-----------------------------------|-----------------------------------------------|-------------------------------|------------------------------------------|
|                                                                     |                                   | <b>Included<br/>N=2424</b>                    | <b>Not included<br/>N=592</b> |                                          |
| Number of children under 5 years living in household*, median (IQR) | 2 (1-3)                           | 2 (1-3)                                       | 2 (1-3)                       | 2 (1-3)                                  |
| Monthly family income (in Bangladeshi taka)*, median (IQR)          | 16000 (12000-25000)               | 18000 (12000-25000)                           | 15000 (11000-25000)           | 15000 (12000-21000)                      |
| Number of children stunted*                                         | 720 (21.8%)                       | 502 (20.7%)                                   | 152 (25.8%)                   | 66 (23.2%)                               |
| Number of children underweight*                                     | 272 (8.2%)                        | 192 (7.9%)                                    | 52 (8.8%)                     | 28 (9.9%)                                |
| Mother's age (years)*, mean (SD)                                    | 23.9 (4.8)                        | 24.1 (4.8)                                    | 23.3 (4.8)                    | 23.8 (5.1)                               |
| Mother's BMI (kg/m <sup>2</sup> )†, mean (SD)                       | 23.9 (4.2)                        | 24.1 (4.2)                                    | 23.0 (4.0)                    | 23.4 (4.0)                               |
| Mother's educational status*                                        |                                   |                                               |                               |                                          |
| No education                                                        | 145 (4.4%)                        | 96 (4.0%)                                     | 30 (5.1%)                     | 19 (6.7%)                                |
| 1-8 years                                                           | 1759 (53.3%)                      | 1242 (51.3%)                                  | 355 (60.0%)                   | 162 (57.0%)                              |
| 9-12 years                                                          | 1288 (39.1%)                      | 996 (41.1%)                                   | 195 (32.9%)                   | 97 (34.2%)                               |
| >12 years                                                           | 106 (3.2%)                        | 88 (3.6%)                                     | 12 (2.0%)                     | 6 (2.1%)                                 |
| Mother's main occupation*                                           |                                   |                                               |                               |                                          |
| Unemployed                                                          | 3204 (97.1%)                      | 2357 (97.3%)                                  | 571 (96.5%)                   | 276 (97.2%)                              |
| Unskilled job                                                       | 31 (0.9%)                         | 22 (0.9%)                                     | 7 (1.2%)                      | 2 (0.7%)                                 |
| Skilled job                                                         | 63 (1.9%)                         | 43 (1.8%)                                     | 14 (2.4%)                     | 6 (2.1%)                                 |
| Father's age (years)*, mean (SD)                                    | 30.9 (6.0)                        | 31.1 (5.9)                                    | 30.2 (6.2)                    | 30.4 (5.9)                               |
| Father's educational status*                                        |                                   |                                               |                               |                                          |
| No education                                                        | 305 (9.2%)                        | 204 (8.4%)                                    | 68 (11.5%)                    | 33 (11.6%)                               |
| 1-8 years                                                           | 1726 (52.3%)                      | 1265 (52.2%)                                  | 314 (53.0%)                   | 147 (51.8%)                              |
| 9-12 years                                                          | 1084 (32.9%)                      | 809 (33.4%)                                   | 186 (31.4%)                   | 89 (31.3%)                               |
| >12 years                                                           | 183 (5.5%)                        | 144 (5.9%)                                    | 24 (4.1%)                     | 15 (5.3%)                                |
| Father's main occupation‡                                           |                                   |                                               |                               |                                          |
| Unemployed                                                          | 38 (1.2%)                         | 24 (1.0%)                                     | 8 (1.4%)                      | 6 (2.1%)                                 |
| Unskilled job                                                       | 659 (20.0%)                       | 451 (18.6%)                                   | 138 (23.4%)                   | 70 (24.6%)                               |
| Skilled job                                                         | 2448 (74.3%)                      | 1830 (75.6%)                                  | 423 (71.6%)                   | 195 (68.7%)                              |
| Other                                                               | 150 (4.6%)                        | 115 (4.8%)                                    | 22 (3.7%)                     | 13 (4.6%)                                |

\* 2 missing values. † 14 missing values. ‡ 5 missing values.

Data are median (IQR), n (%), or mean (SD).

Unskilled job describes manual unskilled work e.g. housemaid, garment worker involved in unskilled tasks, labourer, farmer, fisherman, rickshaw puller. Skilled job describes skilled employment e.g. garment worker, cook, construction work, driving, tailor, craftsman, carpentry, government or non-government clerical work, health service providers including primary health workers, pharmacists, doctor, teacher. A total of 592 families were contacted for the COVID impact study but not recruited (see reasons in Supplementary Figure 1) and 284 families were not contacted during the COVID impact study (May-June 2020).

Supplementary Table 2: Comparisons in asset ownership and child stunting between COVID impact study and national population

|                                                    | <b>COVID impact study<br/>(May-June 2020)<br/>N=2424</b> | <b>DHS Survey<br/>2017</b> |
|----------------------------------------------------|----------------------------------------------------------|----------------------------|
| Television in your house*                          | 1925 (79.5%)                                             | 47.3%                      |
| Mobile phone in your house*                        | 2377 (98.1%)                                             | 94.4%                      |
| Refrigerator in your house*                        | 1657 (68.4%)                                             | 29.1%                      |
| Fan in your house*                                 | 2388 (98.6%)                                             | 80.2%                      |
| Computer in your house*                            | 151 (6.2%)                                               | 5.7%                       |
| Any land of your own (except land used for house)* | 951 (39.3%)                                              | 46.7%                      |
| Buffalo/cow in your house*                         | 274 (11.3%)                                              | 0.4%                       |
| Duck/hen in your house*                            | 768 (31.7%)                                              | 56.4%                      |
| Child Stunted                                      | 502 (20.7%)                                              | 19.8%                      |

\* N=2422.

Data are n (%).

### Supplementary Table 3: Financial impact of COVID-19 lockdown

|                                                                      | <b>COVID impact study<br/>(May-June 2020)<br/>N=2424</b> |
|----------------------------------------------------------------------|----------------------------------------------------------|
| Reduction in employment, work or income*                             | 2321 (96.0%)                                             |
| Reduction in employment, work or income†                             |                                                          |
| Unemployed                                                           | 23/24 (95.8%)                                            |
| Unskilled job                                                        | 436/450 (96.9%)                                          |
| Skilled job                                                          | 1751/1825 (95.9%)                                        |
| Other                                                                | 108/114 (94.7%)                                          |
| Reduction in income during COVID-19*                                 |                                                          |
| No change/<one quarter                                               | 127 (5.3%)                                               |
| A quarter reduced                                                    | 180 (7.4%)                                               |
| Half reduced                                                         | 639 (26.4%)                                              |
| Three quarter reduced                                                | 453 (18.7%)                                              |
| Completely reduced/ no income at present                             | 945 (39.1%)                                              |
| Don't know                                                           | 73 (3.0%)                                                |
| Means of coping with reduced income (more than one answer possible)‡ |                                                          |
| From current income                                                  | 1411 (61.5%)                                             |
| Utilizing savings                                                    | 1070 (46.7%)                                             |
| Procuring a loan                                                     | 747 (32.6%)                                              |
| Selling valuables                                                    | 43 (1.9%)                                                |
| Accessing Government relief                                          | 264 (11.5%)                                              |
| Accessing other relief (relatives, charity)                          | 446 (19.5%)                                              |
| Other                                                                | 37 (1.6%)                                                |
| Don't know                                                           | 6 (0.3%)                                                 |
| Consideration of financial stability during the crisis*              |                                                          |
| Very unstable (always worrying about income or future)               | 1300 (53.8%)                                             |
| Somewhat unstable (occasionally worrying about income)               | 888 (36.7%)                                              |
| Stable (no worries)                                                  | 229 (9.5%)                                               |

\* N=2417. † N=2413. ‡ N=2293.

Data are n (%).



Supplementary Table 4: Interrupted time series analyses

|                                                                      | Estimate | 95% Confidence Interval | p value |
|----------------------------------------------------------------------|----------|-------------------------|---------|
| <b>Food insecurity<sup>1</sup> (N=6976)</b>                          |          |                         |         |
| Intercept                                                            | 19.3%    | [17.8%, 20.9%]          | <0.0001 |
| Pre-lockdown trend                                                   | -0.8%    | [-2.9%, 1.2%]           | 0.43    |
| Level change lockdown                                                | 51.7%    | [48.1%, 55.4%]          | <0.0001 |
| <b>Food insecurity by father's occupation<sup>1,2</sup> (N=6966)</b> |          |                         |         |
| Unemployed                                                           |          |                         |         |
| Intercept                                                            | 37.5%    | [18.1%, 56.9%]          | <0.0001 |
| Pre-lockdown trend                                                   | -10.2%   | [-32.5%, 12.1%]         | 0.37    |
| Level change lockdown                                                | 53.8%    | [15.6%, 92.0%]          | 0.0058  |
| Unskilled                                                            |          |                         |         |
| Intercept                                                            | 36.9%    | [32.4%, 41.3%]          | <0.0001 |
| Pre-lockdown trend                                                   | -11.3%   | [-16.9%, -5.7%]         | <0.0001 |
| Level change lockdown                                                | 63.1%    | [53.6%, 72.5%]          | <0.0001 |
| Skilled                                                              |          |                         |         |
| Intercept                                                            | 15.6%    | [13.9%, 17.2%]          | <0.0001 |
| Pre-lockdown trend                                                   | 1.5%     | [-0.8%, 3.8%]           | 0.20    |
| Level change lockdown                                                | 50.0%    | [45.9%, 54.2%]          | <0.0001 |
| Other                                                                |          |                         |         |
| Intercept                                                            | 7.0%     | [2.3%, 11.6%]           | 0.0034  |
| Pre-lockdown trend                                                   | 5.4%     | [-1.5%, 12.3%]          | 0.12    |
| Level change lockdown                                                | 33.1%    | [19.8%, 46.3%]          | <0.0001 |
| <b>Maternal depression<sup>3</sup> (N=6953)</b>                      |          |                         |         |
| Intercept                                                            | 4        | [3.9, 4.1]              | <0.0001 |
| Pre-lockdown trend                                                   | 0        | [-0.9, 0.9]             | 1.00    |
| Level change lockdown                                                | 6        | [5.6, 6.4]              | <0.0001 |

<sup>1</sup>Food insecure yes defined as mildly, moderately, or severely food insecure and no as food secure according to the household food insecurity access category. The overall proportion of food insecure families with non-missing data was 468/2420 (19.3%) at baseline, 396/2139 (18.5%) at endline, and 1678/2417 (69.4%) during the COVID-19 impact study. Baseline, endline, and COVID-19 impact study values were analysed with segmented regression using a generalised linear regression model with binomial distribution and identify link function, accounting for clustering within a participant. The model estimates the risk or risk difference.

<sup>2</sup>The p value for the interaction test between level change lockdown and father's occupation is 0.0037.

<sup>3</sup> Maternal depression measured using CES-D derived as the sum of the six depression symptom questions (whereby the answers to question 4 were recoded to indicate negative feelings) and ranges between 0 and 42. Larger values indicate more depressive symptoms. The median (25<sup>th</sup> to 75<sup>th</sup> percentile) score was 4 (0-11) in 2419 mothers at baseline, 4 (0-10) in 2124 mothers at endline, and 10 (3-17) in 2410 mothers during the COVID-19 impact study. Baseline, endline, and COVID-19 impact study values were analysed with segmented regression using a median regression model, accounting for clustering within a participant. The model estimates the median.

Supplementary Table 5: Impact of COVID-19 lockdown on mental health

| <b>COVID impact study<br/>(May-June 2020)</b> |              |
|-----------------------------------------------|--------------|
| <b>N=2424</b>                                 |              |
| CES-D total*                                  | 10 (3-17)    |
| Changed since late March 2020*                | 1444 (59.9%) |
| If changed, how:                              |              |
| More than before                              | 1425 (98.7%) |
| Less than before                              | 19 (1.3%)    |
| GAD-7 total*                                  | 3 (1-7)      |
| GAD-7 anxiety categories*                     |              |
| Minimal anxiety                               | 1465 (60.8%) |
| Mild anxiety                                  | 620 (25.7%)  |
| Moderate anxiety                              | 293 (12.2%)  |
| Severe anxiety                                | 32 (1.3%)    |
| Changed since late March 2020*                | 1657 (68.8%) |
| If changed, how:                              |              |
| More than before                              | 1639 (98.9%) |
| Less than before                              | 18 (1.1%)    |

\* N=2410.

Data are median (IQR) or n (%).

CES-D is derived as the sum of the six depression symptom questions (whereby the answers to question 4 were recoded to indicate negative feelings) and ranges between 0 and 42. Larger values indicate more depressive symptoms.

GAD-7 is derived as the sum of the seven anxiety symptom questions and ranges between 0 and 21. Larger values indicate more anxiety symptoms. A GAD-7 total score is categorised as minimal anxiety if 0-4, mild anxiety if 5-9, moderate anxiety if 10-14, and severe anxiety if 15-21.

Supplementary Table 6: Intimate partner violence during the COVID-19 lockdown

|                                                                              | COVID impact study<br>(May-June 2020)<br>N=2174 | Exact 95%<br>Confidence<br>Interval |
|------------------------------------------------------------------------------|-------------------------------------------------|-------------------------------------|
| <b>Emotional violence</b>                                                    |                                                 |                                     |
| Insulted you or did something that made you feel insulted?                   |                                                 |                                     |
| No                                                                           | 1733 (79.7%)                                    | [78.0%, 81.4%]                      |
| Yes                                                                          | 432 (19.9%)                                     | [18.2%, 21.6%]                      |
| Not interested to answer                                                     | 9 (0.4%)                                        | [0.2%, 0.8%]                        |
| If yes, has this been different since the COVID situation?                   |                                                 |                                     |
| More than before                                                             | 290 (68.4%)                                     | [63.7%, 72.8%]                      |
| Same                                                                         | 115 (27.1%)                                     | [22.9%, 31.6%]                      |
| Less than before                                                             | 18 (4.2%)                                       | [2.5%, 6.6%]                        |
| Not interested to answer                                                     | 1 (0.2%)                                        | [0%, 1.3%]                          |
| Humiliated you in front of others?*                                          |                                                 |                                     |
| No                                                                           | 1970 (90.7%)                                    | [89.4%, 91.8%]                      |
| Yes                                                                          | 194 (8.9%)                                      | [7.8%, 10.2%]                       |
| Not interested to answer                                                     | 9 (0.4%)                                        | [0.2%, 0.8%]                        |
| If yes, has this been different since the COVID situation?                   |                                                 |                                     |
| More than before                                                             | 126 (66.0%)                                     | [58.8%, 72.7%]                      |
| Same                                                                         | 58 (30.4%)                                      | [23.9%, 37.4%]                      |
| Less than before                                                             | 6 (3.1%)                                        | [1.2%, 6.7%]                        |
| Not interested to answer                                                     | 1 (0.5%)                                        | [0%, 2.9%]                          |
| Intimidated you (e.g. special look to scare you, shouting, breaking things)? |                                                 |                                     |
| No                                                                           | 1869 (86.0%)                                    | [84.4%, 87.4%]                      |
| Yes                                                                          | 294 (13.5%)                                     | [12.1%, 15.0%]                      |
| Not interested to answer                                                     | 11 (0.5%)                                       | [0.3%, 0.9%]                        |
| If yes, has this been different since the COVID situation?                   |                                                 |                                     |
| More than before                                                             | 200 (68.7%)                                     | [63.1%, 74.0%]                      |
| Same                                                                         | 81 (27.8%)                                      | [22.8%, 33.4%]                      |
| Less than before                                                             | 10 (3.4%)                                       | [1.7%, 6.2%]                        |
| Threatened you?                                                              |                                                 |                                     |
| No                                                                           | 2059 (94.7%)                                    | [93.7%, 95.6%]                      |
| Yes                                                                          | 104 (4.8%)                                      | [3.9%, 5.8%]                        |
| Not interested to answer                                                     | 11 (0.5%)                                       | [0.3%, 0.9%]                        |
| If yes, has this been different since the COVID situation?                   |                                                 |                                     |
| More than before                                                             | 52 (51.5%)                                      | [41.3%, 61.6%]                      |
| Same                                                                         | 40 (39.6%)                                      | [30.0%, 49.8%]                      |
| Less than before                                                             | 9 (8.9%)                                        | [4.2%, 16.2%]                       |
| <b>Physical violence</b>                                                     |                                                 |                                     |
| Slapped you or thrown something at you that could hurt you?                  |                                                 |                                     |
| No                                                                           | 2021 (93.0%)                                    | [91.8%, 94.0%]                      |
| Yes                                                                          | 141 (6.5%)                                      | [5.5%, 7.6%]                        |
| Not interested to answer                                                     | 12 (0.6%)                                       | [0.3%, 1.0%]                        |
| If yes, has this been different since the COVID situation?                   |                                                 |                                     |
| More than before                                                             | 76 (56.3%)                                      | [47.5%, 64.8%]                      |
| Same                                                                         | 47 (34.8%)                                      | [26.8%, 43.5%]                      |
| Less than before                                                             | 12 (8.9%)                                       | [4.7%, 15.0%]                       |
| Pushed you or shoved you or pulled your hair?                                |                                                 |                                     |
| No                                                                           | 2108 (97.0%)                                    | [96.2%, 97.6%]                      |
| Yes                                                                          | 54 (2.5%)                                       | [1.9%, 3.2%]                        |
| Not interested to answer                                                     | 12 (0.6%)                                       | [0.3%, 1.0%]                        |

|                                                                   | COVID impact study<br>(May-June 2020)<br>N=2174 | Exact 95%<br>Confidence<br>Interval |
|-------------------------------------------------------------------|-------------------------------------------------|-------------------------------------|
| If yes, has this been different since the COVID situation?        |                                                 |                                     |
| More than before                                                  | 32 (59.3%)                                      | [45.0%, 72.4%]                      |
| Same                                                              | 19 (35.2%)                                      | [22.7%, 49.4%]                      |
| Less than before                                                  | 2 (3.7%)                                        | [0.5%, 12.7%]                       |
| Not interested to answer                                          | 1 (1.9%)                                        | [0%, 9.9%]                          |
| Hit you with his fist or with something else that could hurt you? |                                                 |                                     |
| No                                                                | 2106 (96.9%)                                    | [96.1%, 97.6%]                      |
| Yes                                                               | 56 (2.6%)                                       | [2.0%, 3.3%]                        |
| Not interested to answer                                          | 12 (0.6%)                                       | [0.3%, 1.0%]                        |
| If yes, has this been different since the COVID situation?        |                                                 |                                     |
| More than before                                                  | 27 (49.1%)                                      | [35.4%, 62.9%]                      |
| Same                                                              | 21 (38.2%)                                      | [25.4%, 52.3%]                      |
| Less than before                                                  | 7 (12.7%)                                       | [5.3%, 24.5%]                       |
| Kicked, dragged, beaten, choked or burnt you?                     |                                                 |                                     |
| No                                                                | 2129 (97.9%)                                    | [97.2%, 98.5%]                      |
| Yes                                                               | 33 (1.5%)                                       | [1.0%, 2.1%]                        |
| Not interested to answer                                          | 12 (0.6%)                                       | [0.3%, 1.0%]                        |
| If yes, has this been different since the COVID situation?        |                                                 |                                     |
| More than before                                                  | 18 (54.5%)                                      | [36.4%, 71.9%]                      |
| Same                                                              | 11 (33.3%)                                      | [18.0%, 51.8%]                      |
| Less than before                                                  | 2 (6.1%)                                        | [0.7%, 20.2%]                       |
| Not interested to answer                                          | 2 (6.1%)                                        | [0.7%, 20.2%]                       |
| Threatened with or actually used a gun, knife or other weapon?    |                                                 |                                     |
| No                                                                | 2150 (98.9%)                                    | [98.4%, 99.3%]                      |
| Yes                                                               | 12 (0.6%)                                       | [0.3%, 1.0%]                        |
| Not interested to answer                                          | 12 (0.6%)                                       | [0.3%, 1.0%]                        |
| If yes, has this been different since the COVID situation?        |                                                 |                                     |
| More than before                                                  | 7 (58.3%)                                       | [27.7%, 84.8%]                      |
| Same                                                              | 4 (33.3%)                                       | [9.9%, 65.1%]                       |
| Less than before                                                  | 1 (8.3%)                                        | [0.2%, 38.5%]                       |
| <b>Sexual violence</b>                                            |                                                 |                                     |
| Physically forced to have sexual intercourse†                     |                                                 |                                     |
| No                                                                | 2048 (94.4%)                                    | [93.4%, 95.3%]                      |
| Yes                                                               | 65 (3.0%)                                       | [2.3%, 3.8%]                        |
| Not interested to answer                                          | 56 (2.6%)                                       | [2.0%, 3.3%]                        |
| If yes, has this been different since the COVID situation?        |                                                 |                                     |
| More than before                                                  | 33 (50.8%)                                      | [38.1%, 63.4%]                      |
| Same                                                              | 22 (33.8%)                                      | [22.6%, 46.6%]                      |
| Less than before                                                  | 9 (13.8%)                                       | [6.5%, 24.7%]                       |
| Not interested to answer                                          | 1 (1.5%)                                        | [0%, 8.3%]                          |

\* N=2173. † N=2169.

Data are n (%) or n (%) and two-sided 95% confidence interval.

This module was not administered if the mother did not live in the same house with her husband. As a result, 227/2422 (9.5%) of the mothers did not provide data on intimate partner violence.

### Supplementary Text 1: Reliability and agreement in COVID-19 impact pilot study

We measured reliability and agreement of the food insecurity, maternal depression and anxiety, and intimate partner violence domains of our COVID-19 impact study in a sample of mothers of our BRISC study participants using an internal pilot study. The interviewers who contributed to this pilot were previously trained and involved in the data collection of the BRISC trial, which included the food security and maternal depression domains. In total 77 participants were included in the pilot COVID-19 impact sample, 55 in the intra-rater sample and 22 in the inter-rater sample. The average time between two ratings by the same or second rater was 3.5 days (range: 2.6 to 4.5 days). The intraclass correlations for intra-rater reliability were 0.73 for food security, 0.84 for maternal depression, 0.78 for maternal anxiety, and 0.67 for intimate partner violence. The percent agreements between two different raters were 60% for food security, 77% for maternal depression, 76% for maternal anxiety, and 86% for intimate partner violence.
